# Supplementary material
Source: ML conference proceedings conference paper supplement (https://openaccess.thecvf.com/content/CVPR2023/html/Stergiou_The_Wisdom_of_CVPR_2023_paper.html)
Supplement: Supplementary file 1 [file Stergiou_The_Wisdom_of_CVPR_2023_supplemental.pdf]

# The Wisdom of Crowds: Temporal Progressive Attention for Early Action Prediction – Supplementary Material

Table S1. Ablation studies across scales  $n = \{1, 2, 3, 4\}$  on UCF-101 over different observation ratios ( $\rho$ ). Methods are grouped w.r.t. the backbone used. The best overall performance per  $\rho$  is in **bold** and the second best results are underlined.

| Method                                | Backbone         | dim | Observation ratios ( $\rho$ ) |             |             |             |             |             |             |             |             |
|---------------------------------------|------------------|-----|-------------------------------|-------------|-------------|-------------|-------------|-------------|-------------|-------------|-------------|
|                                       |                  |     | 0.1                           | 0.2         | 0.3         | 0.4         | 0.5         | 0.6         | 0.7         | 0.8         | 0.9         |
| <b>TemPr – (ours)</b>                 | X3D <sub>M</sub> | 3D  | 84.8                          | 91.8        | 92.3        | 92.6        | 93.0        | 93.4        | 93.5        | 93.6        | 93.6        |
| <b>TemPr = (ours)</b>                 |                  |     | 85.3                          | 92.3        | 92.8        | 93.7        | 93.9        | 93.9        | 94.2        | 94.4        | 94.3        |
| <b>TemPr <math>\leq</math> (ours)</b> |                  |     | 87.4                          | 93.3        | 93.9        | 94.4        | 94.0        | 94.2        | 94.4        | 94.9        | 94.9        |
| <b>TemPr <math>\leq</math> (ours)</b> |                  |     | <u>87.9</u>                   | <u>93.4</u> | <u>94.5</u> | <u>94.8</u> | 95.1        | <b>95.2</b> | <b>95.6</b> | <u>96.4</u> | <b>96.3</b> |
| <b>TemPr – (ours)</b>                 | MoViNet-A4       | 3D  | 85.2                          | 92.1        | 92.5        | 92.9        | 93.3        | 93.7        | 93.5        | 93.8        | 93.7        |
| <b>TemPr = (ours)</b>                 |                  |     | 85.6                          | 92.9        | 93.6        | 94.5        | 94.4        | 94.2        | 94.2        | 94.6        | 94.8        |
| <b>TemPr <math>\leq</math> (ours)</b> |                  |     | 87.3                          | 93.1        | <b>94.9</b> | 94.6        | <u>95.2</u> | <u>94.9</u> | 94.6        | 95.1        | 95.0        |
| <b>TemPr <math>\leq</math> (ours)</b> |                  |     | <b>88.6</b>                   | <b>93.5</b> | <b>94.9</b> | <b>94.9</b> | <b>95.4</b> | <b>95.2</b> | <u>95.3</u> | <b>96.6</b> | <u>96.2</u> |

Table S2. Top tower predictors per class and observation ratio for TemPr  $\leq$ . Towers  $\mathcal{T}_1 \leq$ ,  $\mathcal{T}_2 \leq$ ,  $\mathcal{T}_3 \leq$  and  $\mathcal{T}_4 \leq$  are highlighted for better readability.

| class name                                 | Observation ratios $\rho$ |                 |                 |                 |                 |                 |
|--------------------------------------------|---------------------------|-----------------|-----------------|-----------------|-----------------|-----------------|
|                                            | 0.1                       | 0.2             | 0.3             | 0.5             | 0.7             | 0.9             |
| Putting smthng similar to other things ... | $\mathcal{T}_4$           | $\mathcal{T}_4$ | $\mathcal{T}_4$ | $\mathcal{T}_4$ | $\mathcal{T}_4$ | $\mathcal{T}_4$ |
| Showing smthng behind smthng               | $\mathcal{T}_4$           | $\mathcal{T}_4$ | $\mathcal{T}_4$ | $\mathcal{T}_4$ | $\mathcal{T}_4$ | $\mathcal{T}_3$ |
| Holding smthng                             | $\mathcal{T}_4$           | $\mathcal{T}_4$ | $\mathcal{T}_4$ | $\mathcal{T}_3$ | $\mathcal{T}_4$ | $\mathcal{T}_4$ |
| Poking ... smthng without ... collapsing   | $\mathcal{T}_4$           | $\mathcal{T}_4$ | $\mathcal{T}_4$ | $\mathcal{T}_3$ | $\mathcal{T}_4$ | $\mathcal{T}_4$ |
| Pretending to sprinkle air onto smthng     | $\mathcal{T}_3$           | $\mathcal{T}_4$ | $\mathcal{T}_4$ | $\mathcal{T}_4$ | $\mathcal{T}_4$ | $\mathcal{T}_3$ |
| Pulling two ends of smthng ... stretched   | $\mathcal{T}_4$           | $\mathcal{T}_4$ | $\mathcal{T}_3$ | $\mathcal{T}_3$ | $\mathcal{T}_4$ | $\mathcal{T}_4$ |
| Putting smthng into smthng                 | $\mathcal{T}_4$           | $\mathcal{T}_3$ | $\mathcal{T}_3$ | $\mathcal{T}_4$ | $\mathcal{T}_4$ | $\mathcal{T}_4$ |
| Pretending to turn smthng upside down      | $\mathcal{T}_4$           | $\mathcal{T}_3$ | $\mathcal{T}_4$ | $\mathcal{T}_3$ | $\mathcal{T}_3$ | $\mathcal{T}_4$ |
| Poking a stack of smthng ... collapses     | $\mathcal{T}_4$           | $\mathcal{T}_4$ | $\mathcal{T}_3$ | $\mathcal{T}_4$ | $\mathcal{T}_3$ | $\mathcal{T}_e$ |
| Pulling smthng from left to right          | $\mathcal{T}_3$           | $\mathcal{T}_4$ | $\mathcal{T}_4$ | $\mathcal{T}_3$ | $\mathcal{T}_4$ | $\mathcal{T}_e$ |
| Pushing smthng from left to right          | $\mathcal{T}_3$           | $\mathcal{T}_4$ | $\mathcal{T}_3$ | $\mathcal{T}_3$ | $\mathcal{T}_4$ | $\mathcal{T}_4$ |
| Pretending to open smthng without ...      | $\mathcal{T}_4$           | $\mathcal{T}_3$ | $\mathcal{T}_4$ | $\mathcal{T}_3$ | $\mathcal{T}_3$ | $\mathcal{T}_2$ |
| Opening smthng                             | $\mathcal{T}_4$           | $\mathcal{T}_4$ | $\mathcal{T}_3$ | $\mathcal{T}_3$ | $\mathcal{T}_2$ | $\mathcal{T}_2$ |
| Showing a photo of smthng ...              | $\mathcal{T}_4$           | $\mathcal{T}_3$ | $\mathcal{T}_4$ | $\mathcal{T}_2$ | $\mathcal{T}_2$ | $\mathcal{T}_1$ |
| Stuffing smthng into smthng                | $\mathcal{T}_4$           | $\mathcal{T}_3$ | $\mathcal{T}_3$ | $\mathcal{T}_2$ | $\mathcal{T}_2$ | $\mathcal{T}_2$ |
| Putting smthng on the edge of smthng ...   | $\mathcal{T}_4$           | $\mathcal{T}_3$ | $\mathcal{T}_4$ | $\mathcal{T}_2$ | $\mathcal{T}_1$ | $\mathcal{T}_1$ |
| Picking smthng up                          | $\mathcal{T}_4$           | $\mathcal{T}_3$ | $\mathcal{T}_2$ | $\mathcal{T}_2$ | $\mathcal{T}_1$ | $\mathcal{T}_2$ |
| Closing smthng                             | $\mathcal{T}_4$           | $\mathcal{T}_3$ | $\mathcal{T}_2$ | $\mathcal{T}_2$ | $\mathcal{T}_3$ | $\mathcal{T}_2$ |
| Putting smthng upright on the table        | $\mathcal{T}_4$           | $\mathcal{T}_3$ | $\mathcal{T}_2$ | $\mathcal{T}_1$ | $\mathcal{T}_2$ | $\mathcal{T}_2$ |
| Turning smthng upside down                 | $\mathcal{T}_3$           | $\mathcal{T}_3$ | $\mathcal{T}_2$ | $\mathcal{T}_2$ | $\mathcal{T}_2$ | $\mathcal{T}_1$ |
| Pulling two ends of smthng ... two pieces  | $\mathcal{T}_3$           | $\mathcal{T}_2$ | $\mathcal{T}_1$ | $\mathcal{T}_2$ | $\mathcal{T}_2$ | $\mathcal{T}_2$ |

notable improvements on smaller observation ratios. For  $\rho = 0.1$  TemPr  $\leq$  demonstrates a +3.1% improvement from TemPr – on X3D<sub>M</sub> and +3.6% on MoViNet-A4.

**Top tower predictor per class.** To better understand the performance of individual towers  $\mathcal{T}_i$ , we compare their performance across SSsub21 classes. In Table S2, we present the top-performing tower for each class across observation ratios. Overall, we observe that towers trained on larger scales ( $\mathcal{T}_3 \leq$  and  $\mathcal{T}_4 \leq$ ) are better suited for classes that also include long-term dependencies. E.g. classes such as *Poking a stack of something without the stack collapsing*, *Pretending to sprinkle air onto something*, *Showing something behind something*, or *Putting something into something*, require a larger part of the action to be observable to become distinguishable. In contrast, towers for smaller scales, are better suited for classes such as *Picking something up*, *Closing something*, or *Turning something upside down*, which are distinguishable from only a few frames.

**SSsub21 class accuracies.** To further determine the performance of tower predictors in Table S2, we show in Figure S1 the per-class accuracies of all towers for  $\rho = 0.3$ . Overall, because features are more motion-based compared to UCF-101, coarser scales perform better. Considering the *Putting something on the edge of something so it is not supported and falls down* class, the object will typically fall down only at the end of the action. Therefore, such information is better captured by the coarser scales. Similarly, for *Pretending to sprinkle air onto something*, pretending can only be captured over a longer temporal scale. Fine scales perform more favorably for shorter actions such as *Closing something*, *Picking something up*, and *Turning something*

## S1. Cross-scale accuracy and class predictions

**Scale configurations.** Supplementary to Table 1 in the main text, we consider the two top-performing backbones in Table S1 and ablate over four scale configurations on UCF-101.

For both models, and across observation ratios, TemPr  $\leq$  outperforms all other scale configurations with the most

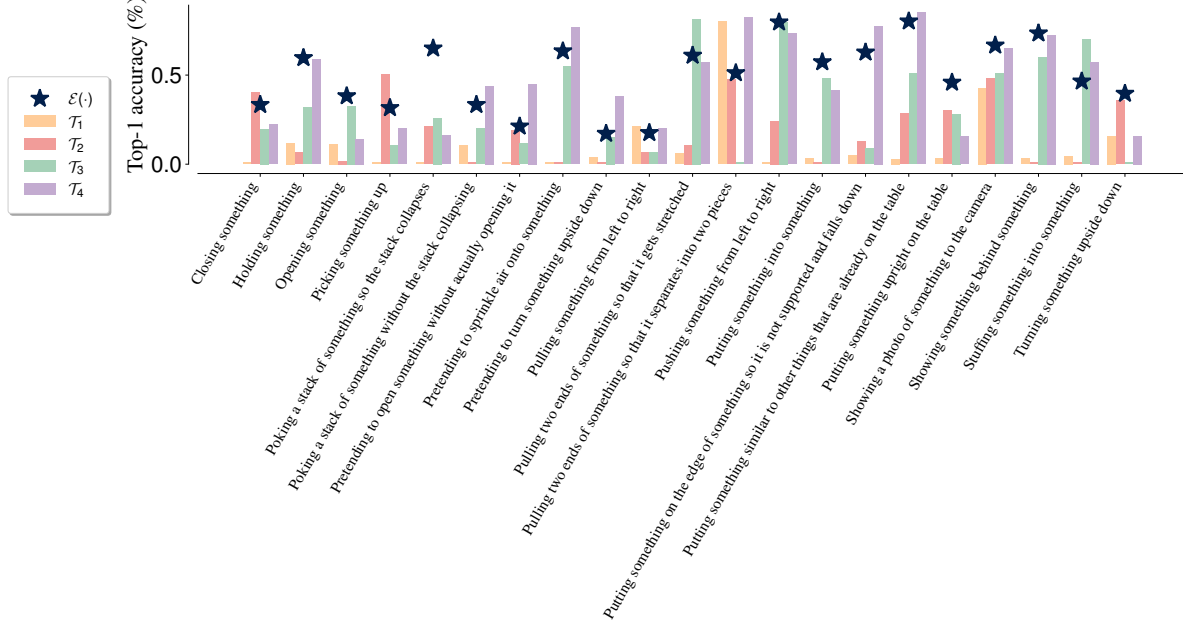

Figure S1. **TemPr**  $\frac{1}{2}$  SSsub21 class accuracies over observation ratio  $\rho = 0.3$ .

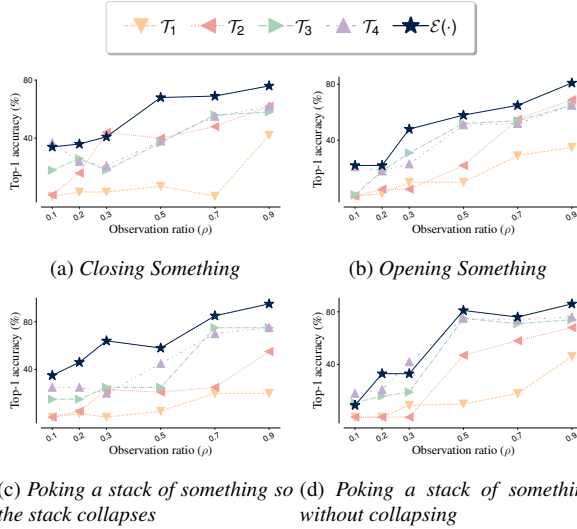

Figure S2. **TemPr**  $\frac{1}{2}$  SSsub21 tower accuracies across observation ratios for classes (a) *Closing Something*, (b) *Opening Something*, (c) *Poking a stack of something so the stack collapses* and (d) *Poking a stack of something without collapsing*.

*upside down*. For the majority of these classes, informative motions only last a few frames and are thus better addressed by finer scales. Additionally, in Figure S2 we observe that **TemPr**  $\frac{1}{2}$  relies more on coarser scales to capture the differences between visually similar classes. Considering the pairs *Closing something* from Figure S2a and *Open-*

Table S3. Tower acc. UCF101.

| $\mathcal{T}/\mathcal{E}$   | $\rho$      |             |             |             |             |             |
|-----------------------------|-------------|-------------|-------------|-------------|-------------|-------------|
|                             | 0.1         | 0.2         | 0.3         | 0.5         | 0.7         | 0.9         |
| $\mathcal{T}_4 \frac{1}{2}$ | 78.5        | 82.3        | 86.3        | 84.1        | 89.3        | 87.7        |
| $\mathcal{E}(\cdot)$        | <b>84.3</b> | <b>90.2</b> | <b>90.4</b> | <b>91.2</b> | <b>92.1</b> | <b>92.4</b> |

Table S4. Tower acc. SSsub21.

| $\mathcal{T}/\mathcal{E}$   | $\rho$      |             |             |             |             |             |
|-----------------------------|-------------|-------------|-------------|-------------|-------------|-------------|
|                             | 0.1         | 0.2         | 0.3         | 0.5         | 0.7         | 0.9         |
| $\mathcal{T}_4 \frac{1}{2}$ | 26.0        | 31.6        | 34.1        | 36.9        | 40.6        | 45.2        |
| $\mathcal{E}(\cdot)$        | <b>28.4</b> | <b>34.8</b> | <b>37.9</b> | <b>41.3</b> | <b>45.8</b> | <b>48.6</b> |

*ing something* from Figure S2b, as well as *Poking a stack of something so the stack collapses* from Figure S2c and *Poking a stack of something without the stack collapsing* in Figure S2d, there is a stronger reliance to  $\mathcal{T}_4 \frac{1}{2}$  and  $\mathcal{T}_3 \frac{1}{2}$ , with  $\mathcal{T}_2 \frac{1}{2}$  only performing better for specific  $\rho$ .

**UCF-101 class accuracies.** In Figure S3, we present accuracies for the first 30 classes on UCF-101. Overall, the performance of the aggregation function is equivalent to that of the top-performing tower. For the *BreastStroke* class, the finer scale  $\mathcal{T}_1 \frac{1}{2}$  outperforms other tower predictors. This is also the case for the *Billiards* class which shows a similar trend with  $\mathcal{T}_1 \frac{1}{2}$  achieving the best performance. We believe the high accuracy over the fine scales of both *BreastStroke* and *Billiards* classes, is due to their unique appear-

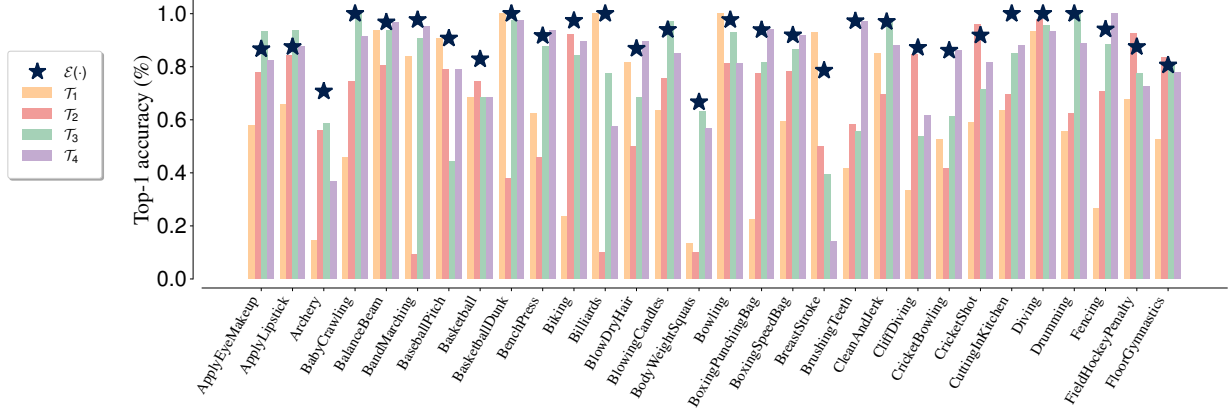

Figure S3. **TemPr**  $\underline{\mathbf{u}}$  UCF-101 class accuracies for the first 30 classes over observation ratio  $\rho = 0.3$ .

Table S5. **Tower designs.**

| Tower design   | $\rho$ |      |
|----------------|--------|------|
|                | 0.2    | 0.4  |
| MLP $\times 4$ | 72.4   | 81.1 |
| MLP $\times 8$ | 73.1   | 81.3 |
| <b>(ours)</b>  | 90.2   | 90.9 |

Table S6. **Bottleneck size comparison** based on latent array ( $\mathbf{u}$ ) index dimension ( $d$ ) used by the cross-attention blocks.

| $d$ | Mem. (GB) | Observation ratios ( $\rho$ ) |                    |                    |                    |
|-----|-----------|-------------------------------|--------------------|--------------------|--------------------|
|     |           | 0.2                           | 0.4                | 0.6                | 0.8                |
| 128 | 1.65      | 89.1 (-1.1)                   | 89.6 (-1.3)        | 90.1 (-1.7)        | 90.7 (-2.3)        |
| 256 | 3.01      | 90.2                          | 90.9               | 91.8               | 92.3               |
| 512 | 5.74      | <b>90.7 (+0.3)</b>            | <b>91.3 (+0.4)</b> | <b>92.1 (+0.3)</b> | <b>92.4 (+0.1)</b> |

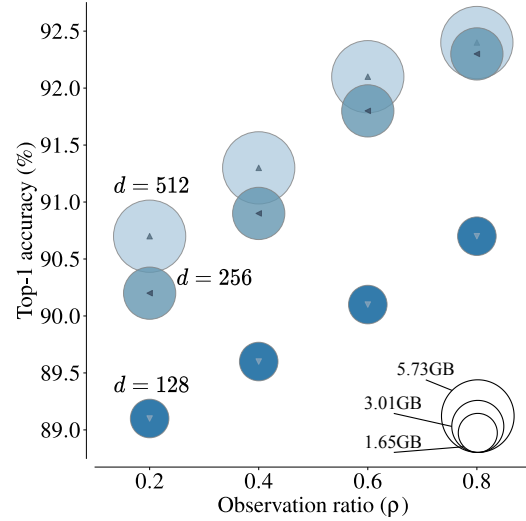

Figure S4. **Bottleneck size** ( $d$ ) for latent array ( $\mathbf{u}$ ).

ance and motion features. Thus, for only a small portion of the video, the ongoing action can be correctly predicted.

**Tower and aggregation function accuracies.** Motivated by class accuracy trends observed in Figure S3 and Figure S1 for UCF-101 and SSsub21, we compare the performance of the final attention tower  $\mathcal{T}_4$  to that of the  $\mathcal{E}(\cdot)$  aggregator from TemPr  $\underline{\mathbf{u}}$ . Results for UCF-101 are presented in Table S3 and for SSsub21 in Table S4. Consistent improvements are observed by the predictor ensemble compared to the predictions made from individual towers.

## S2. Further ablations

As with the ablation results in Section 4.3 of the main text, we use TemPr  $\underline{\mathbf{u}}$  with ResNet-18 backbone on UCF-101 for all experiments in this section.

**Cross-attention layer replacements.** We include tower ablations in Table S5 with  $\times 4/8$  MLP layers to assess if the

improvements are indeed due to our design. A notable drop is observed with the replacement of the attention towers.

**Latent array  $\mathbf{u}$  size:** In Figure S4 we present performance results on UCF-101 given different latent array  $\mathbf{u}$  sizes  $d$ . Size  $d = 256$  is shown to be the most cost-effective size as improvements over  $d = 128$  range between (1.1-2.3)% while requiring  $\sim 50\%$  less memory than  $d = 512$ . We additionally detail numerically these individual performances in Table S6. In terms of memory,  $d = 128$  requires 1.36GB less than  $d = 256$ , while  $d = 512$  uses 2.73GB more.

**Number of self attention blocks.** Table S7 demonstrates the impact of the Self MAB number on the accuracy. Increasing the number of self-attention blocks improves accuracy mostly in small observation ratios, while marginally increasing the complexity and memory requirements. We, therefore, adopt  $L = 8$  for our model.

Table S7. Number of self attention blocks (L)

| L | Latency (secs)     | Pars             | FLOPs | Mem. | $\rho$ |             |             |             |             |
|---|--------------------|------------------|-------|------|--------|-------------|-------------|-------------|-------------|
|   | I ( $\downarrow$ ) | B ( $\uparrow$ ) | (M)   | (G)  | (GB)   | 0.2         | 0.4         | 0.6         | 0.8         |
| 1 | 0.31               | 1.07             | 20.3  | 1.29 | 2.74   | 70.9        | 74.8        | 80.4        | 86.2        |
| 2 | 0.31               | 1.09             | 20.6  | 1.32 | 2.78   | 77.2        | 76.3        | 82.8        | 86.7        |
| 4 | 0.32               | 1.12             | 21.5  | 1.37 | 2.85   | 83.4        | 84.9        | 85.1        | 87.4        |
| 6 | 0.32               | 1.16             | 22.2  | 1.42 | 2.93   | 88.7        | 89.5        | 89.8        | 90.1        |
| 8 | 0.34               | 1.27             | 23.0  | 1.47 | 3.01   | <b>90.2</b> | <b>90.9</b> | <b>91.8</b> | <b>92.3</b> |

Table S8. Ablation on aggregation function.

| (a) SSsub21.                |             |             | (b) EK-100.                 |             |             |            |             |             |             |
|-----------------------------|-------------|-------------|-----------------------------|-------------|-------------|------------|-------------|-------------|-------------|
| Aggregation                 | $\rho$      |             | Aggregation                 | $\rho$      |             |            |             |             |             |
|                             | 0.2         | 0.5         |                             | 0.2         | 0.4         | 0.6        | 0.8         | 0.2         | 0.5         |
| avg                         | 32.3        | 38.6        | avg                         | 21.5        | 23.9        | 8.8        | 51.3        | 42.2        | 27.5        |
| softmax                     | 31.4        | 36.8        | softmax                     | 19.4        | 23.1        | 8.3        | 50.7        | 41.4        | 24.6        |
| ICW                         | 32.4        | 38.8        | adapt. $\mathcal{E}(\cdot)$ | <b>22.5</b> | <b>25.5</b> | <b>9.8</b> | <b>54.2</b> | <b>43.4</b> | <b>28.9</b> |
| adapt. $\mathcal{E}(\cdot)$ | <b>34.8</b> | <b>41.3</b> |                             |             |             |            |             |             |             |

Table S9. Ablating contributions with individual and combined replacement.

| replacement(s)  |                         |                                       | Obs. ratio ( $\rho$ ) |             |             |             |
|-----------------|-------------------------|---------------------------------------|-----------------------|-------------|-------------|-------------|
| I.              | II.                     | III.                                  |                       |             |             |             |
| $s_{1,\dots,n}$ | $f(\hat{\mathbf{z}}_i)$ | $\mathcal{E}(\mathbf{y}_{1,\dots,n})$ |                       |             |             |             |
| $\downarrow$    | $\downarrow$            | $\downarrow$                          |                       |             |             |             |
| $s_n \times n$  | $f(\mathbf{z}_i)$       | $f(\hat{\mathbf{z}})$                 | 0.2                   | 0.4         | 0.6         | 0.8         |
| <b>Proposed</b> |                         |                                       | <b>90.2</b>           | <b>90.9</b> | <b>91.8</b> | <b>92.3</b> |
| <b>X</b>        |                         |                                       | 86.4                  | 88.3        | 88.8        | 89.0        |
|                 | <b>X</b>                |                                       | 69.4                  | 73.2        | 78.6        | 85.5        |
|                 |                         | <b>X</b>                              | 89.5                  | 90.1        | 90.6        | 91.2        |
| <b>X</b>        | <b>X</b>                |                                       | 64.3                  | 69.8        | 75.9        | 83.4        |
|                 | <b>X</b>                | <b>X</b>                              | 67.4                  | 72.8        | 77.3        | 84.7        |
| <b>X</b>        |                         | <b>X</b>                              | 84.2                  | 87.0        | 87.4        | 88.3        |
| <b>X</b>        | <b>X</b>                | <b>X</b>                              | 61.4                  | 67.2        | 73.5        | 79.3        |

**SSsub21 and EK-100 aggregation functions.** Supplementary to the results in Table 3b for different aggregation functions on UCF-101, we induce additional ablations for SSsub21 and EK-100 in Table S8a and Table S8b respectively. Across both datasets, our proposed adaptive predictor accumulation  $\mathcal{E}(\cdot)$  performs favorably compared to other aggregation methods. An average improvement of +5.4% and +3.8% is observed for UCF-101 and SSsub21.

**Combined ablations.** Motivated by Table 3 in the main paper, we present combined changes in the model configuration based on our contributions. Setting I. replaces the progressive scales with  $n$  copies of the observable video,  $s_{1,\dots,n} \rightarrow s_n \times n$ . In setting II. the class predictions are made from the extracted CNN features without the utilization of the attention towers  $f(\hat{\mathbf{z}}_i^L) \rightarrow f(\mathbf{z}_i)$ . For setting III. the predictor aggregation function is replaced by averaging classifier predictions  $\mathcal{E}(f(\hat{\mathbf{z}}_{1,\dots,n})) \rightarrow f(\hat{\mathbf{z}})$ . On average, a 14.63% accuracy reduction is observed across ratios when

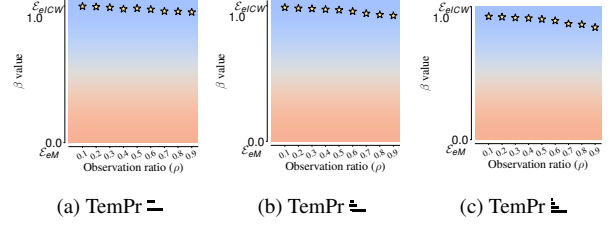Figure S5. Post-training  $\beta$  values over obs. ratios on UCF-101.

predictions are made directly from CNN features. This drop is further amplified when progressive sampling is not used, demonstrating the importance of both the proposed architecture and sub-sampling approach.

### S3. Predictor aggregation $\beta$ values

Our proposed adaptive predictor aggregation function relies on a combination of the similarity of predictor probability distributions and their confidences. The trainable parameter of the function defined in Eq. 7 is  $\beta$  which determines the portion of  $\mathcal{E}(\cdot)$  and  $\mathcal{E}(\cdot)$  that are used for composing the final aggregated probability distribution.

We visualize the values of the  $\beta$  parameter, for each TemPr configuration that employs multiple scales ( $-$ ,  $-$ ,  $-$ ,  $-$  and  $-$ ) across observation ratios in Figure S5. We use the UCF-101 TemPr models with MoViNet-A4. In general, the  $\beta$  value remains high within 0.98–0.84 for all observation ratios. A small decrease is observed in larger  $\rho$ , as independent predictors are exposed to larger portions of the video and can better predict the ongoing action individually.

### S4. Additional Qualitative results over tower predictions

We have presented and discussed qualitative results over TemPr  $-$ ,  $-$ ,  $-$ ,  $-$  configurations and individual towers  $\mathcal{T}_1$ ,  $\mathcal{T}_2$ ,  $\mathcal{T}_3$ ,  $\mathcal{T}_4$  in Section 4.3. Here we provide additional examples in the same format as Figure 4, where predictions differ across TemPr  $-$  towers.

As shown in Figure S6, presented over 2 pages, our proposed progressive scales can benefit feature modeling for a variety of action instances e.g. for the *Lunges* instance, the finer scales ( $\mathcal{T}_1$  and  $\mathcal{T}_2$ ) focus on smaller motions and thus are less influenced by global motion in the video. For *Lunges* and *IceDancing* (from UCF-101), these global motions are similar to those performed for *BodyWeightSquats* and *SalsaSpin*. On the other hand, for the *HighJump* and *SkateBoarding* instances from UCF-101, as well as *hoping* in NTU-RGB and *Pretending to turn something upside down* and *Closing something* in SSsub21, coarse scales are better suited, as motions over larger temporal lengths are more descriptive of the action performed. Failure cases for



coarse scales are evident in the chosen examples of *Shaving Beard* from UCF-101, *wipe face* in NTU-RGB, and *turn-off tap* in EPIC-KITCHENS-100, where motions that are descriptive for the class, are performed fast and over shorter temporal durations.

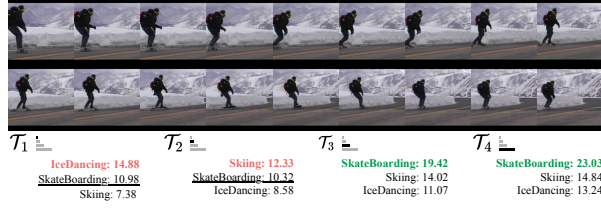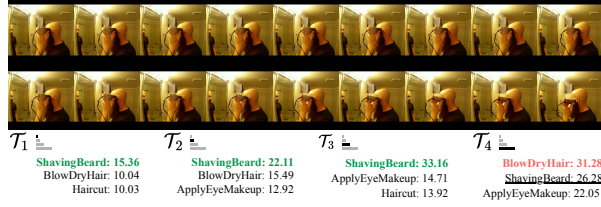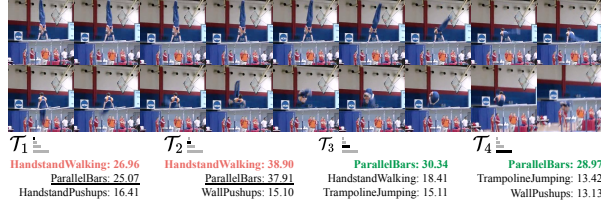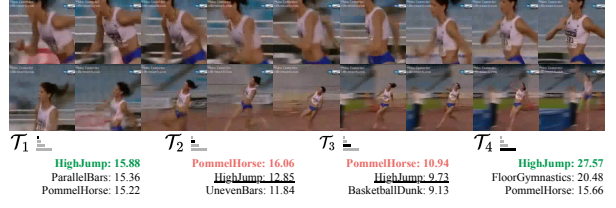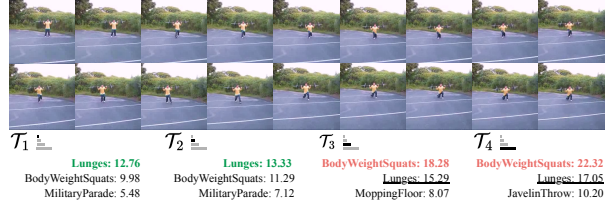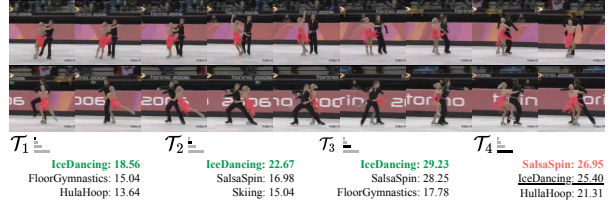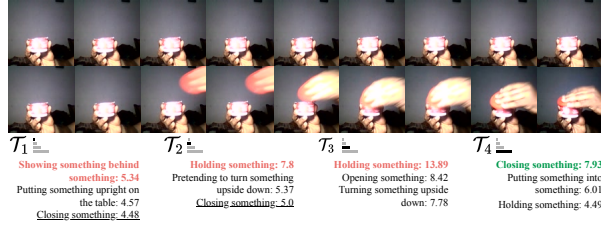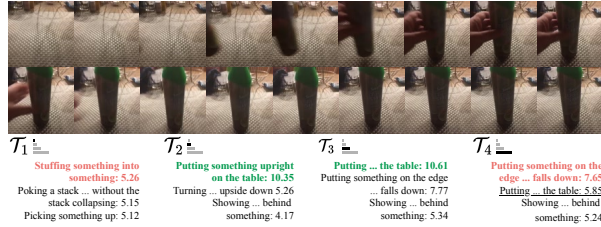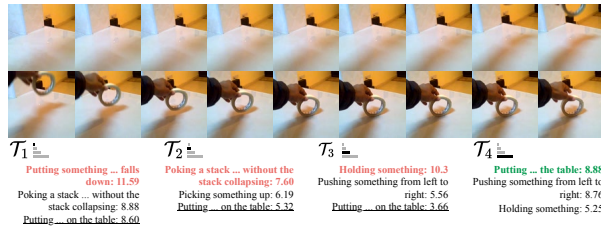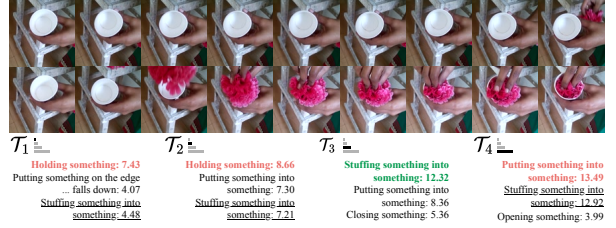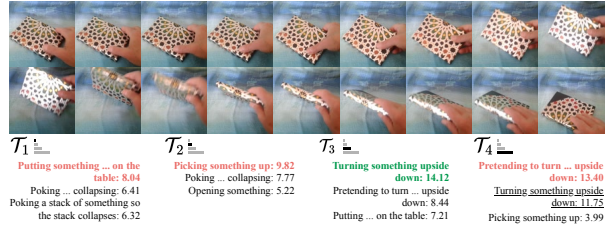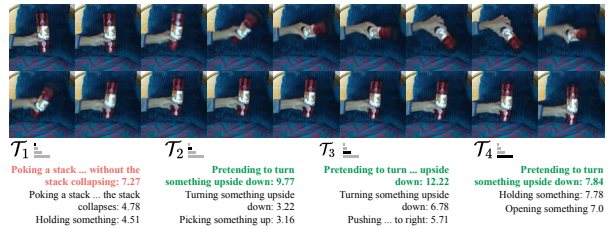

Figure S6. Instances over UCF-101, SSsub21, NTU-RGB and EK-100. Top 3 action labels are reported for individual tower predictors  $\mathcal{T}_i$  (continues to the next page).

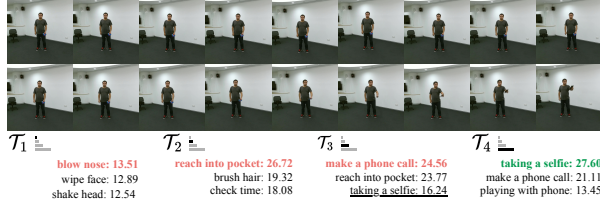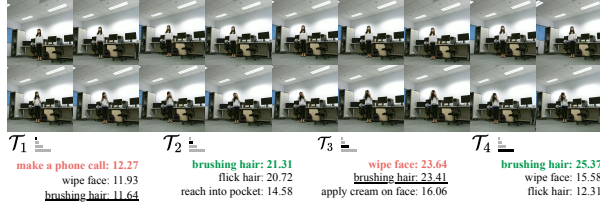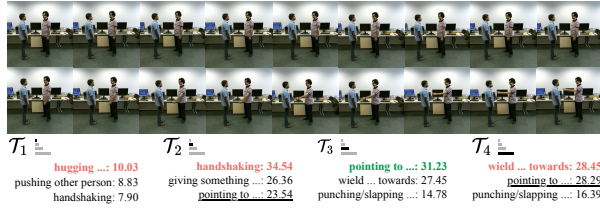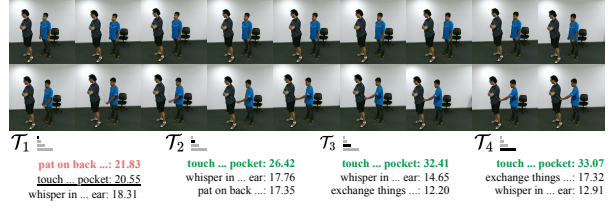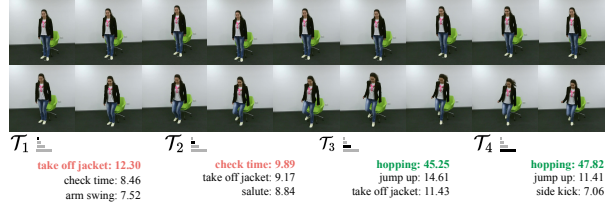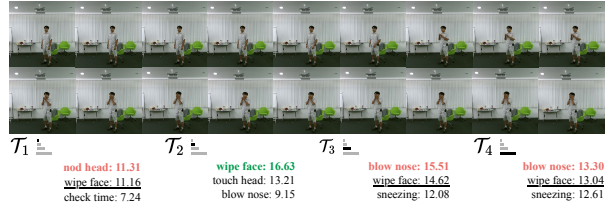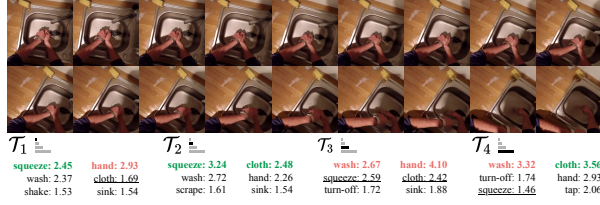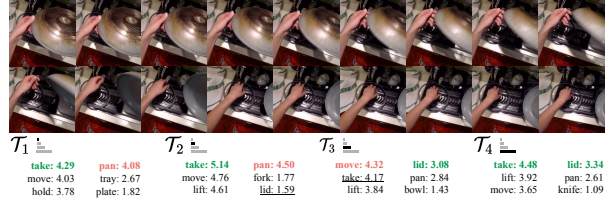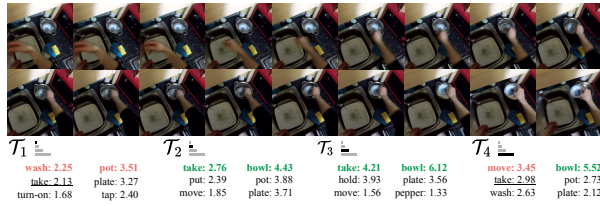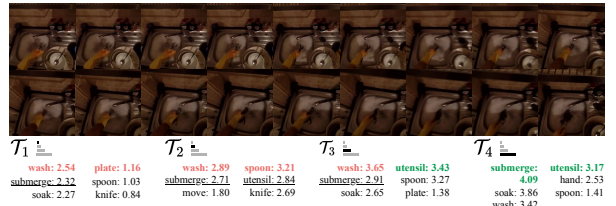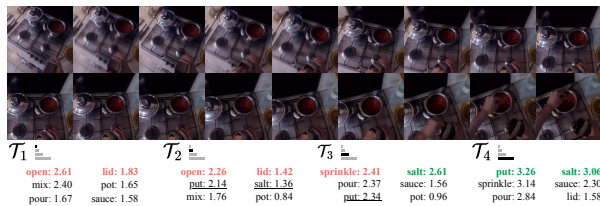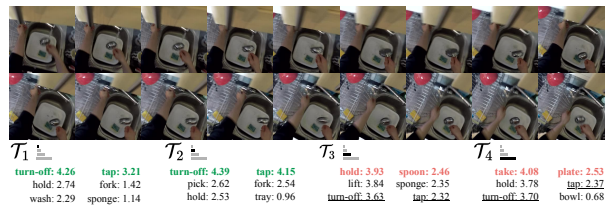

Figure S6. Instances over UCF-101, SSsub21, NTU-RGB and EK-100. Top 3 action labels are reported for individual tower predictors ( $\mathcal{T}_i$ ).
